# Supplementary material for: CDK1/FBXW7 Facilitates&nbsp;Degradation and Ubiquitination of MLST8 to Inhibit Progression of Renal Cell Carcinoma
Source: Research Square preprint supplement (doi:10.21203/rs.3.rs-97872/v1), 2020-10-30
Supplement: Supplementary file 1 [file ef448aa9ebb7e2720f9db845.docx]

**Supplementary Table S1. sequence of primers qT-PCR**

| Gene name | Forward (5’-3’) | Reverse (5’-3’) |
| --- | --- | --- |
| FBXW7 | CCCACCTACCCCTCCTATGT | TGCCCATTCATCTTGTGGTA |
| MLST8 | TGATTGCTGCTGCAGGTTAC | GTTAATGGGTGCGTTCACCT |
| GAPDH | ACCAGAAGACTGTGGATGG | TGCTGTAGAAAAATTCGTTG |

**sequences of primers for sgRNAs**

| Gene | Sequence (5’→3’) |
| --- | --- |
| sgControl | Forward: 5’CACCGGGGCAGGTCCACAATACTAC3’  Reverse: 5’AAACGTAGTATTGTGGACCTGCCCC3’ |
| sgFBXW7#1 | Forward: 5’CACCGTTCGGCGTCGTTGTTGCCCT3’  Reverse: 5’AAACAGGGCAACAACGACGCCGAAC3’ |
| sgFBXW7#2 | Forward: 5’ CACCGAGTGGAAGTATGCCCATATA3’  Reverse: 5’ AAACTATATGGGCATACTTCCACTC3’ |
| sgMLST8#1 | Forward: 5’CACCGGACGGCCGCTGGATGTACAC3’  Reverse: 5’ AAACGTGTACATCCAGCGGCCGTCC3’ |
| sgMLST8#2 | Forward: 5’CACCGAGACGGCCGCTGGATGTACA3’  Reverse: 5’ AAACTGTACATCCAGCGGCCGTCTC3’ |
